# Supplementary material
Source: PubMed Central journal article supplement (PMC6756938)
Supplement: NIHMS1528095-supplement-1.pdf [file NIHMS1528095-supplement-1.pdf]

**Table S1.** Dialysis Treatment Parameters According to Randomized Treatment Assignment

| <b>HD Characteristic</b>              | <b>Placebo</b> | <b>Mannitol</b> | <b>P</b> |
|---------------------------------------|----------------|-----------------|----------|
| <b>Qb, mL/min</b>                     |                |                 |          |
| <b>HD<sub>1</sub> (n=52)</b>          | 200 [200, 200] | 200 [200, 200]  | 0.30     |
| <b>HD<sub>2</sub> (n=52)</b>          | 300 [300, 300] | 300 [250, 300]  | 0.18     |
| <b>HD<sub>3</sub> (n=52)</b>          | 400 [300, 400] | 400 [350, 400]  | 0.74     |
| <b>Qd, mL/min</b>                     |                |                 |          |
| <b>HD<sub>1</sub> (n=52)</b>          | 400 [400, 400] | 400 [400, 400]  | 0.35     |
| <b>HD<sub>2</sub> (n=52)</b>          | 600 [600, 600] | 600 [600, 600]  | 0.07     |
| <b>HD<sub>3</sub> (n=52)</b>          | 800 [800, 800] | 800 [800, 800]  | 0.34     |
| <b>Session length, mins</b>           |                |                 |          |
| <b>HD<sub>1</sub> (n=52)</b>          | 120 [120, 120] | 120 [120, 120]  | 0.68     |
| <b>HD<sub>2</sub> (n=52)</b>          | 180 [180, 180] | 180 [180, 180]  | 0.69     |
| <b>HD<sub>3</sub> (n=52)</b>          | 240 [240, 240] | 240 [240, 240]  | 0.56     |
| <b>Ultrafiltration Rate, ml/kg/hr</b> |                |                 |          |
| <b>HD<sub>1</sub> (n=43)</b>          | 3.6 [0.0, 6.3] | 2.2 [0.0, 6.8]  | 0.94     |
| <b>HD<sub>2</sub> (n=45)</b>          | 5 [2.5, 7.5]   | 6.1 [2.7, 8.1]  | 0.31     |
| <b>HD<sub>3</sub> (n=44)</b>          | 4.2 [1.8, 8.0] | 5.7 [3.4, 9.5]  | 0.28     |
| <b>Dialysate Temperature, °C</b>      |                |                 |          |
| <b>HD<sub>1</sub> (n=45)</b>          | 36.5 [36, 37]  | 36.5 [36, 37]   | 0.99     |
| <b>HD<sub>2</sub> (n=46)</b>          | 36.5 [36, 37]  | 36.5 [36, 37]   | 0.91     |
| <b>HD<sub>3</sub> (n=45)</b>          | 36.5 [36, 37]  | 37 [36.5, 37]   | 0.25     |

P values refer to a test for difference using the Wilcoxon Rank Sum for non-normally distributed continuous variables, according to randomized treatment assignment  
 Qb, blood flow; Qd, dialysate flow

**Table S2.** Raw Biomarker Concentrations According to Randomized Treatment Assignment

|                               |                                    | <b>Placebo</b>     | <b>Mannitol</b>    | <b>P</b> |
|-------------------------------|------------------------------------|--------------------|--------------------|----------|
| <b>HD Session</b>             |                                    |                    |                    |          |
| <b>HD<sub>1</sub> (n=51)</b>  | <b>Pre-HD BUN (mg/dL)</b>          | 102 ± 32           | 73 ± 26            | 0.001    |
| <b>HD<sub>2</sub> (n=50)</b>  | <b>Pre-HD BUN (mg/dL)</b>          | 70 ± 25            | 52 ± 20            | 0.01     |
| <b>HD<sub>3</sub> (n=49)</b>  | <b>Pre-HD BUN (mg/dL)</b>          | 45 ± 17            | 35 ± 15            | 0.04     |
|                               |                                    |                    |                    |          |
| <b>HD<sub>1</sub> (n=51)</b>  | <b>Pre-HD Osmolality (mOsm/kg)</b> | 336 ± 14           | 326 ± 16           | 0.02     |
| <b>HD<sub>2</sub> (n=50)</b>  | <b>Pre-HD Osmolality (mOsm/kg)</b> | 325 ± 11           | 318 ± 11           | 0.02     |
| <b>HD<sub>3</sub> (n=49)</b>  | <b>Pre-HD Osmolality (mOsm/kg)</b> | 315 ± 12           | 313 ± 10           | 0.49     |
|                               |                                    |                    |                    |          |
| <b>HD<sub>1</sub> (n=49)</b>  | <b>Pre-HD Osmolality (mOsm/kg)</b> | 323 ± 10           | 317 ± 10           | 0.03     |
| <b>HD<sub>2</sub> (n=45)</b>  | <b>Pre-HD Osmolality (mOsm/kg)</b> | 308 ± 5            | 308 ± 7            | 0.95     |
| <b>HD<sub>3</sub> (n=46)</b>  | <b>Pre-HD Osmolality (mOsm/kg)</b> | 305 ± 11           | 304 ± 9            | 0.8      |
|                               |                                    |                    |                    |          |
| <b>HD<sub>1</sub> (n=51)</b>  | <b>Pre-HD hsTnT (ng/L)</b>         | 77 [52, 150]       | 85 [48, 192]       | 0.56     |
| <b>HD<sub>2</sub> (n=50)</b>  | <b>Pre-HD hsTnT (ng/L)</b>         | 79 [41, 149]       | 81 [53, 186]       | 0.70     |
| <b>HD<sub>3</sub> (n=49)</b>  | <b>Pre-HD hsTnT (ng/L)</b>         | 78 [62, 137]       | 80 [44, 210]       | 0.84     |
|                               |                                    |                    |                    |          |
| <b>HD<sub>1</sub> (n=43)</b>  | <b>Pre-HD NTproBNP (pg/mL)</b>     | 5648 [1152, 10629] | 5105 [2011, 18318] | 0.47     |
| <b>HD<sub>2</sub> (n=N/A)</b> | <b>Pre-HD NTproBNP (pg/mL)</b>     | NA                 | NA                 | NA       |
| <b>HD<sub>3</sub> (n=44)</b>  | <b>Pre-HD NTproBNP (pg/mL)</b>     | 5763 [2707, 9384]  | 5498 [2147, 17682] | 0.79     |

P values refer to a test for difference (t-test for normally distributed variables or Wilcoxon Rank Sum for non-normally distributed continuous variables) according to randomized treatment assignment

IDH, defined as SBP drop ≥25 mmHg, developed during 36% of the placebo arm sessions (29 of 81 sessions) versus 20% of the mannitol arm sessions (15 of 75 sessions; P-difference=0.03). When analyzed to account for intra-patient correlation, the use of mannitol was associated with a trend towards lower odds of developing IDH (OR 0.37; 95%CI 0.12 to 1.16; P=0.09).

IDH, defined as SBP drop ≥30 mmHg, developed during 22% of the placebo arm sessions (18 of 81 sessions) versus 13% of the mannitol arm sessions (10 of 75 sessions; P-difference=0.15). When analyzed to account for intra-patient correlation, the use of mannitol was not significantly associated with lower odds of developing IDH, but the magnitude of the effect estimate was consistent with other definitions (OR 0.41; 95%CI 0.12 to 2.04; P=0.31).

**Table S3.** Raw Pre-Dialysis Plasma and Urine Kidney Injury Biomarker Concentrations According to Randomized Treatment Assignment

|                              |                                 | <b>Placebo</b>       | <b>Mannitol</b>      | <b>P</b> |
|------------------------------|---------------------------------|----------------------|----------------------|----------|
| <b>HD Session</b>            |                                 |                      |                      |          |
| <b>HD<sub>1</sub> (n=29)</b> | <b>Plasma MCP1 (pg/mL)</b>      | 217 [140, 264]       | 276 [138, 329]       | 0.46     |
| <b>HD<sub>2</sub> (n=27)</b> | <b>Plasma MCP1 (pg/mL)</b>      | 233 [162, 408]       | 242 [164, 339]       | 0.73     |
| <b>HD<sub>3</sub> (n=27)</b> | <b>Plasma MCP1 (pg/mL)</b>      | 246 [114, 327]       | 234 [164, 369]       | 1.00     |
|                              |                                 |                      |                      |          |
| <b>HD<sub>1</sub> (n=31)</b> | <b>Plasma hTNFr1 (pg/mL)</b>    | 6256 [4763, 8617]    | 6287 [5501, 10211]   | 0.53     |
| <b>HD<sub>2</sub> (n=30)</b> | <b>Plasma hTNFr1 (pg/mL)</b>    | 6447 [4702, 7767]    | 6648 [5939, 10207]   | 0.35     |
| <b>HD<sub>3</sub> (n=29)</b> | <b>Plasma hTNFr1 (pg/mL)</b>    | 6048 [4912, 7925]    | 8682 [6535, 11723]   | 0.06     |
|                              |                                 |                      |                      |          |
| <b>HD<sub>1</sub> (n=31)</b> | <b>Plasma KIM1 (pg/mL)</b>      | 747 [423, 1327]      | 948 [373, 2074]      | 0.72     |
| <b>HD<sub>2</sub> (n=30)</b> | <b>Plasma KIM1 (pg/mL)</b>      | 747 [525, 1380]      | 739 [535, 1805]      | 0.88     |
| <b>HD<sub>3</sub> (n=29)</b> | <b>Plasma KIM1 (pg/mL)</b>      | 783 [578, 1313]      | 868 [504, 2111]      | 0.79     |
|                              |                                 |                      |                      |          |
| <b>HD<sub>1</sub> (n=31)</b> | <b>Plasma IL-18 (pg/mL)</b>     | 474 [290, 822]       | 483 [269, 800]       | 0.91     |
| <b>HD<sub>2</sub> (n=30)</b> | <b>Plasma IL-18 (pg/mL)</b>     | 408 [297, 929]       | 496 [283, 802]       | 0.72     |
| <b>HD<sub>3</sub> (n=29)</b> | <b>Plasma IL-18 (pg/mL)</b>     | 390 [344, 704]       | 594 [378, 1072]      | 0.16     |
|                              |                                 |                      |                      |          |
| <b>HD<sub>1</sub> (n=31)</b> | <b>Plasma SuPAR (pg/mL)</b>     | 48908 [31747, 61884] | 53304 [33313, 75263] | 0.48     |
| <b>HD<sub>2</sub> (n=30)</b> | <b>Plasma SuPAR (pg/mL)</b>     | 47730 [31317, 65493] | 55094 [36334, 81399] | 0.31     |
| <b>HD<sub>3</sub> (n=29)</b> | <b>Plasma SuPAR (pg/mL)</b>     | 48123 [32638, 63555] | 50559 [43957, 90821] | 0.43     |
|                              |                                 |                      |                      |          |
| <b>HD<sub>1</sub> (n=31)</b> | <b>Plasma hTNFr2 (pg/mL)</b>    | 7951 [6493, 8944]    | 9225 [7644, 12137]   | 0.13     |
| <b>HD<sub>2</sub> (n=30)</b> | <b>Plasma hTNFr2 (pg/mL)</b>    | 8110 [6533, 9015]    | 9368 [8622, 12530]   | 0.02     |
| <b>HD<sub>3</sub> (n=29)</b> | <b>Plasma hTNFr2 (pg/mL)</b>    | 8045 [6866, 9913]    | 10173 [9090, 12756]  | 0.01     |
|                              |                                 |                      |                      |          |
| <b>HD<sub>1</sub> (n=25)</b> | <b>Urine MCP1/Creat (pg/mg)</b> | 8 [5, 22]            | 17 [9, 24]           | 0.26     |
| <b>HD<sub>2</sub> (n=19)</b> | <b>Urine MCP1/Creat (pg/mg)</b> | 13 [8, 23]           | 16 [15, 28]          | 0.25     |
| <b>HD<sub>3</sub> (n=21)</b> | <b>Urine MCP1/Creat (pg/mg)</b> | 15 [8, 23]           | 24 [18, 65]          | 0.12     |
|                              |                                 |                      |                      |          |
| <b>HD<sub>1</sub> (n=25)</b> | <b>Urine hTNFr1/Creat</b>       | 129 [84, 172]        | 188 [98, 269]        | 0.21     |

|                              |                                   |                   |                   |      |
|------------------------------|-----------------------------------|-------------------|-------------------|------|
|                              | <b>(pg/mg)</b>                    |                   |                   |      |
| <b>HD<sub>2</sub> (n=19)</b> | <b>Urine hTNFr1/Creat (pg/mg)</b> | 149 [111, 212]    | 400 [234, 498]    | 0.01 |
| <b>HD<sub>3</sub> (n=21)</b> | <b>Urine hTNFr1/Creat (pg/mg)</b> | 194 [144, 289]    | 323 [201, 447]    | 0.12 |
|                              |                                   |                   |                   |      |
| <b>HD<sub>1</sub> (n=25)</b> | <b>Urine KIM1/Creat (pg/mg)</b>   | 23 [18, 39]       | 33 [23, 57]       | 0.14 |
| <b>HD<sub>2</sub> (n=19)</b> | <b>Urine KIM1/Creat (pg/mg)</b>   | 27 [17, 42]       | 56 [48, 60]       | 0.03 |
| <b>HD<sub>3</sub> (n=21)</b> | <b>Urine KIM1/Creat (pg/mg)</b>   | 29 [19, 58]       | 64 [46, 82]       | 0.07 |
|                              |                                   |                   |                   |      |
| <b>HD<sub>1</sub> (n=25)</b> | <b>Urine IL-18/Creat (pg/mg)</b>  | 0 [0, 1]          | 1 [0, 1]          | 0.51 |
| <b>HD<sub>2</sub> (n=19)</b> | <b>Urine IL-18/Creat (pg/mg)</b>  | 1 [0, 1]          | 2 [1, 2]          | 0.01 |
| <b>HD<sub>3</sub> (n=21)</b> | <b>Urine IL18/Creat (pg/mg)</b>   | 1 [0, 3]          | 2 [1, 3]          | 0.29 |
|                              |                                   |                   |                   |      |
| <b>HD<sub>1</sub> (n=25)</b> | <b>Urine SuPAR/Creat (pg/mg)</b>  | 3640 [2093, 5635] | 4445 [3116, 6967] | 0.37 |
| <b>HD<sub>2</sub> (n=19)</b> | <b>Urine SuPAR/Creat (pg/mg)</b>  | 3868 [2990, 7408] | 7369 [6496, 8130] | 0.15 |
| <b>HD<sub>3</sub> (n=21)</b> | <b>Urine SuPAR/Creat (pg/mg)</b>  | 7008 [4665, 9204] | 7397 [5143, 9081] | 0.67 |
|                              |                                   |                   |                   |      |
| <b>HD<sub>1</sub> (n=25)</b> | <b>Urine hTNFr2/Creat (pg/mg)</b> | 103 [68, 162]     | 160 [115, 196]    | 0.07 |
| <b>HD<sub>2</sub> (n=19)</b> | <b>Urine hTNFr2/Creat (pg/mg)</b> | 114 [84, 172]     | 249 [214, 316]    | 0.01 |
| <b>HD<sub>3</sub> (n=21)</b> | <b>Urine hTNFr2/Creat (pg/mg)</b> | 172 [138, 226]    | 223 [173, 276]    | 0.20 |

P values refer to a test for difference (Wilcoxon Rank Sum for non-normally distributed continuous variables) according to randomized treatment assignment

**Table S4.** Difference in pre-HD Biomarkers According to Randomized Treatment Assignment

|                                       | <b>Percent Change in Pre-Dialysis Biomarkers (from HD<sub>1</sub> to HD<sub>3</sub>) for Mannitol versus Placebo</b> |           |
|---------------------------------------|----------------------------------------------------------------------------------------------------------------------|-----------|
|                                       | <b>Ratio</b>                                                                                                         | <b>P*</b> |
| <b>Plasma MCP1</b> (n=26)             | 6% (-37% to 81%)                                                                                                     | 0.81      |
| <b>Plasma hTNFr1</b> (n=29)           | 20% (4% to 39%)                                                                                                      | 0.01      |
| <b>Plasma KIM1</b> (n=29)             | -3% (-23% to 22%)                                                                                                    | 0.81      |
| <b>Plasma Urine IL-18</b> (n=29)      | 77% (3% to 304%)                                                                                                     | 0.04      |
| <b>Plasma huPAR</b> (n=29)            | 13% (-2% to 31%)                                                                                                     | 0.09      |
| <b>Plasma hTNFr2</b> (n=29)           | 14% (3% to 25%)                                                                                                      | 0.01      |
| <b>Urine MCP1/Creatinine</b> (n=19)   | -3% (-42% to 61%)                                                                                                    | 0.89      |
| <b>Urine hTNFr1/Creatinine</b> (n=19) | -11% (-44% to 42%)                                                                                                   | 0.62      |
| <b>Urine KIM1/Creatinine</b> (n=19)   | 29% (-11% to 86%)                                                                                                    | 0.16      |
| <b>Urine IL-18/Creatinine</b> (n=19)  | 206% (-29% to 600%)                                                                                                  | 0.17      |
| <b>Urine SuPAR/Creatinine</b> (n=19)  | -13% (-46% to 41%)                                                                                                   | 0.55      |
| <b>Urine hTNFr2/Creatinine</b> (n=19) | -17% (-44% to 22%)                                                                                                   | 0.31      |

Effect estimates are calculated as the difference in log-transformed biomarkers between HD<sub>3</sub> and HD<sub>1</sub>, adjusted for baseline pre-HD<sub>1</sub> biomarker concentrations.

\*P values are not adjusted for multiple comparisons.

**Table S5.** Summary of adverse events

| <b>Adverse Event</b>                         | <b>Placebo (n=27)</b> | <b>Mannitol (n=25)</b> | <b>P</b> |
|----------------------------------------------|-----------------------|------------------------|----------|
| Number of participants<br>(Number of events) |                       |                        |          |
| <b>Hypertension (&gt;180mmHg)</b>            | 10 (15)               | 9 (15)                 | 1.0      |
| <b>Chest Pain</b>                            | 0 (0)                 | 2 (2)                  | 0.23     |
| <b>Tachycardia</b>                           | 0 (0)                 | 1 (1)                  | 0.48     |
| <b>Nausea</b>                                | 5 (5)                 | 1 (1)                  | 0.19     |
| <b>Cramps</b>                                | 2 (2)                 | 1 (2)                  | 1.0      |
| <b>Headache</b>                              | 2 (3)                 | 1 (1)                  | 1.0      |
| <b>Confusion</b>                             | 2 (2)                 | 1 (1)                  | 1.0      |
| <b>Oxygen Requirement</b>                    | 2 (2)                 | 4 (7)                  | 0.41     |
| <b>Access Dysfunction</b>                    | 2 (2)                 | 2 (2)                  | 1.0      |
| <b>Urinary Tract Infection</b>               | 0 (0)                 | 1 (1)                  | 0.48     |

P-value for difference in number of participants between groups using Fisher's exact test
